# Supplementary material for: Nectar mimicry: a new phenomenon
Source: PubMed Central journal article supplement (PMC7184725; doi:10.1038/s41598-020-63997-3), 2020-04-27
Supplement: 41598_2020_63997_MOESM1_ESM.pdf [file 41598_2020_63997_MOESM1_ESM.pdf]

## **Nectar mimicry: a new phenomenon**

Klaus Lunau<sup>1,2</sup>, Zong-Xin Ren<sup>2</sup>, Xiao-Qing Fan<sup>2,3</sup>, Judith Trunschke<sup>2</sup>, Graham H. Pyke<sup>2,4</sup>, & Hong Wang<sup>2</sup>

<sup>1</sup>Institute of Sensory Ecology, Heinrich-Heine-University, Dusseldorf, Germany

<sup>2</sup>CAS Key Laboratory for Plant Diversity and Biogeography of East Asia, Kunming Institute of Botany, Chinese Academy of Sciences, Kunming 650201  
Kunming, PR China

<sup>3</sup>College of Life Sciences, Shaanxi Normal University, Xian 710100, China

<sup>4</sup>Dept of Biological Sciences, Macquarie University, Ryde, NSW 2019, Australia

Corresponding authors: Klaus Lunau, E-mail: Klaus.Lunau@hhu.de

Zong-Xin Ren, E-mail: renzongxin@mail.kib.ac.cn

**Table S1.** Species list containing identified 309 species of the Yulong and Baima Snow Mountains and categorized features of nectar, pollen, glossy structures, and altitude.

| FAMILY        | SPECIES                                          | FIORAL SYMMETRY                    | NECTAR    | GLOSSY STRUCTURE           | INVISIBLE POLLEN & POLLEN MIMICRY             | ALITUDE               |
|---------------|--------------------------------------------------|------------------------------------|-----------|----------------------------|-----------------------------------------------|-----------------------|
| Solanaceae    | <i>Nicandra physalodes</i>                       | radially symmetrical flower        | no nectar | glossy basal part of petal | floral guide mimics anther colour             | 2700                  |
| Campanulaceae | <i>Codonopsis bulleyana</i>                      | radially symmetrical flower        | visible   | glossy basal part of petal |                                               | 3900                  |
| Campanulaceae | <i>Codonopsis convolvulacea</i>                  | radially symmetrical flower        | visible   | glossy basal part of petal |                                               | 3200                  |
| Campanulaceae | <i>Codonopsis graminifolia</i>                   | radially symmetrical flower        | visible   | glossy basal part of petal |                                               | 3200                  |
| Erodiaceae    | <i>Geranium delavayi</i>                         | radially symmetrical flower        | visible   | glossy basal part of petal |                                               | 3200                  |
| Erodiaceae    | <i>Geranium strictipes</i>                       | radially symmetrical flower        | visible   | glossy basal part of petal |                                               | 3200                  |
| Gentianaceae  | <i>Swertia cincta</i>                            | radially symmetrical flower        | visible   | glossy basal part of petal |                                               | 3200                  |
| Gentianaceae  | <i>Swertia macrosperma</i>                       | radially symmetrical flower        | visible   | glossy basal part of petal | floral guide mimics anther colour             | 3200                  |
| Gentianaceae  | <i>Swertia punicea</i>                           | radially symmetrical flower        | visible   | glossy basal part of petal |                                               | 3200<br>(Yunshanping) |
| Rosaceae      | <i>Potentilla anserina</i>                       | radially symmetrical flower        | visible   | glossy central structures  | floral guide and stigmata mimic anther colour | 3200                  |
| Rosaceae      | <i>Potentilla articulata</i>                     | radially symmetrical flower        | visible   | glossy central structures  | floral guide mimics anther colour             | 4200                  |
| Rosaceae      | <i>Potentilla coriandrifolia</i>                 | radially symmetrical flower        | visible   | glossy central structures  | floral guide mimics anther colour             | 4200                  |
| Rosaceae      | <i>Potentilla eriocarpa</i>                      | radially symmetrical flower        | visible   | glossy central structures  | floral guide mimics anther colour             | 3600                  |
| Rosaceae      | <i>Potentilla fruticosa</i>                      | radially symmetrical flower        | visible   | glossy central structures  |                                               | 3600                  |
| Rosaceae      | <i>Potentilla glabra</i>                         | radially symmetrical flower        | visible   | glossy central structures  |                                               | 3600                  |
| Rosaceae      | <i>Potentilla lancinata</i>                      | radially symmetrical flower        | visible   | glossy central structures  | stigma mimics stamen                          | 2700                  |
| Rosaceae      | <i>Potentilla peduncularis</i> var. <i>curta</i> | radially symmetrical flower        | visible   | glossy central structures  | floral guide mimics anther colour             | 3600                  |
| Saxifragaceae | <i>Saxifraga melanocentra</i>                    | radially symmetrical flower        | visible   | glossy disc                | floral guide mimics anther colour             | 4100                  |
| Saxifragaceae | <i>Saxifraga rufescens</i>                       | zygomorphic flower                 | visible   | glossy disc                | flower center mimics stamen colour            | 3400                  |
| Campanulaceae | <i>Cyananthus formosus</i>                       | radially symmetrical flower        | hidden    | glossy floral guide        |                                               | 4100                  |
| Campanulaceae | <i>Cyananthus longiflorus</i>                    | radially symmetrical flower        | hidden    | glossy floral guide        |                                               | 3200                  |
| Campanulaceae | <i>Cyananthus hookeri</i>                        | radially symmetrical flower        | hidden    | glossy floral guide        |                                               | 3400                  |
| Asteraceae    | <i>Anaphalis chlamydophylla</i>                  | radially symmetrical inflorescence | hidden    | glossy floral guide        |                                               | 4100                  |
| Asteraceae    | <i>Anaphalis nepalensis</i>                      | radially symmetrical inflorescence | hidden    | glossy floral guide        |                                               | 3200                  |
| Asteraceae    | <i>Anaphalis yunnanensis</i> cf                  | radially symmetrical inflorescence | hidden    | glossy floral guide        | anthers and pollen visible                    | 3200                  |

|                |                                                   |                             |           |                      |                                   |                       |
|----------------|---------------------------------------------------|-----------------------------|-----------|----------------------|-----------------------------------|-----------------------|
| Saxifragaceae  | <i>Saxifraga aristulata</i>                       | radially symmetrical flower | visible   | glossy protuberances |                                   | 4200                  |
| Saxifragaceae  | <i>Saxifraga diversifolia</i> ,                   | radially symmetrical flower | visible   | glossy protuberances |                                   | 3200                  |
| Saxifragaceae  | <i>Saxifraga filicaulis</i>                       | radially symmetrical flower | visible   | glossy protuberances |                                   | 3200                  |
| Saxifragaceae  | <i>Saxifraga gemmipara</i>                        | radially symmetrical flower | visible   | glossy protuberances | floral guide mimics anther colour | 3200<br>(Yunshanping) |
| Saxifragaceae  | <i>Saxifraga hispidula</i>                        | radially symmetrical flower | visible   | glossy protuberances |                                   | 4200                  |
| Saxifragaceae  | <i>Saxifraga nigroglandulosa</i>                  | radially symmetrical flower | visible   | glossy protuberances |                                   | 4200                  |
| Saxifragaceae  | <i>Saxifraga strigosa</i>                         | radially symmetrical flower | visible   | glossy protuberances |                                   | 3400                  |
| Saxifragaceae  | <i>Saxifraga wallichiana</i>                      | radially symmetrical flower | visible   | glossy protuberances |                                   | 4200                  |
| Ranunculaceae  | <i>Trollius yunnanensis</i>                       | radially symmetrical flower | no nectar | glossy staminodes    | staminodes mimic stamens          | 3200                  |
| Celastraceae   | <i>Parnassia delavayi</i>                         | radially symmetrical flower | visible   | glossy staminodes    | staminodes mimic stamens          | 3200                  |
| Celastraceae   | <i>Parnassia mysorensis</i>                       | radially symmetrical flower | visible   | glossy staminodes    | staminodes mimic stamens          | 3200                  |
| Celastraceae   | <i>Parnassia tenella</i>                          | radially symmetrical flower | visible   | glossy staminodes    | staminodes mimic stamens          | 3200                  |
| Celastraceae   | <i>Parnassia wightiana</i>                        | radially symmetrical flower | visible   | glossy staminodes    | staminodes mimic stamens          | 2700                  |
| Celastraceae   | <i>Parnassia yunnanensis</i>                      | radially symmetrical flower | visible   | glossy staminodes    | staminodes mimic stamens          | 4100                  |
| Boraginaceae   | <i>Cynoglossum amabile</i>                        | radially symmetrical flower | hidden    |                      |                                   | 3200                  |
| Boraginaceae   | <i>Microula forrestii</i>                         | radially symmetrical flower | hidden    |                      | floral guide mimics anther colour | 4100                  |
| Boraginaceae   | <i>Onosma confertum</i>                           | radially symmetrical flower | hidden    |                      |                                   | 3200                  |
| Brassicaceae   | <i>Megacarpaea delavayi</i>                       | radially symmetrical flower | hidden    |                      |                                   | 3200                  |
| Brassicaceae   | <i>Nasturtium officinale</i>                      | radially symmetrical flower | hidden    |                      |                                   | 4100                  |
| Brassicaceae   | <i>Rorippa elata</i>                              | radially symmetrical flower | hidden    |                      |                                   | 3400                  |
| Campanulaceae  | <i>Adenophora capillaris</i><br>subsp.leptosepala | radially symmetrical flower | hidden    |                      |                                   | 3200                  |
| Campanulaceae  | <i>Adenophora coelestis</i>                       | radially symmetrical flower | hidden    |                      |                                   | 3200                  |
| Campanulaceae  | <i>Campanula crenulata</i>                        | radially symmetrical flower | hidden    |                      |                                   | 3900                  |
| Campanulaceae  | <i>Campanula pallida</i>                          | radially symmetrical flower | hidden    |                      |                                   | 3200                  |
| Campanulaceae  | <i>Cyananthus inflatus</i>                        | radially symmetrical flower | hidden    |                      |                                   | 3600                  |
| Campanulaceae  | <i>Cyananthus macrocalyx</i>                      | radially symmetrical flower | hidden    |                      | floral guide mimics anther colour | 3200                  |
| Caprifoliaceae | <i>Morina nepalensis</i> var. alba                | radially symmetrical flower | hidden    |                      |                                   | 3600                  |
| Caprifoliaceae | <i>Morina nepalensis</i><br>var.delavayi          | radially symmetrical flower | hidden    |                      |                                   | 3200                  |
| Daphnaceae     | <i>Stellera chamaejasme</i>                       | radially symmetrical flower | hidden    |                      |                                   | 3600                  |
| Dianthaceae    | <i>Silene asclepiadea</i>                         | radially symmetrical flower | hidden    |                      |                                   | 3400                  |
| Dianthaceae    | <i>Silene cardiopetala</i>                        | radially symmetrical flower | hidden    |                      |                                   | 3200                  |

|              |                                                                 |                             |        |  |                                   |                       |
|--------------|-----------------------------------------------------------------|-----------------------------|--------|--|-----------------------------------|-----------------------|
| Dianthaceae  | <i>Silene melanantha</i>                                        | radially symmetrical flower | hidden |  |                                   | 3600                  |
| Ericaceae    | <i>Monotropa hypopitys</i>                                      | radially symmetrical flower | hidden |  |                                   | 3200                  |
| Ericaceae    | <i>Pieris formosa</i>                                           | radially symmetrical flower | hidden |  |                                   | 3400                  |
| Ericaceae    | <i>Rhododendron primulaeflorum</i>                              | radially symmetrical flower | hidden |  |                                   | 3200                  |
| Ericaceae    | <i>Vaccinium fragile</i>                                        | radially symmetrical flower | hidden |  |                                   | 3200                  |
| Gentianaceae | <i>Comastoma cyananthiflorum</i><br>var. <i>cyananthiflorum</i> | radially symmetrical flower | hidden |  |                                   | 4100                  |
| Gentianaceae | <i>Gentiana crassicaulis</i>                                    | radially symmetrical flower | hidden |  |                                   | 3200                  |
| Gentianaceae | <i>Gentiana serra</i>                                           | radially symmetrical flower | hidden |  |                                   | 3200<br>(Yunshanping) |
| Gentianaceae | <i>Gentiana sinoornata</i>                                      | radially symmetrical flower | hidden |  |                                   | 4100                  |
| Gentianaceae | <i>Gentiana yunnanensis</i>                                     | radially symmetrical flower | hidden |  |                                   | 3200                  |
| Gentianaceae | <i>Gentianopsis grandis</i>                                     | radially symmetrical flower | hidden |  |                                   | 2700                  |
| Gentianaceae | <i>Halenia elliptica</i>                                        | radially symmetrical flower | hidden |  |                                   | 3200                  |
| Gentianaceae | <i>Lomatogonium lijiangense</i>                                 | radially symmetrical flower | hidden |  |                                   | 4200                  |
| Gesneriaceae | <i>Corallodiscus lanuginosus</i>                                | radially symmetrical flower | hidden |  |                                   | 3200                  |
| Gesneriaceae | <i>Oreocharis forrestii</i>                                     | radially symmetrical flower | hidden |  |                                   | 3200                  |
| Liliaceae    | <i>Disporum brachystemon</i>                                    | radially symmetrical flower | hidden |  |                                   | 3200                  |
| Oleaceae     | <i>Jasminum officinale</i>                                      | radially symmetrical flower | hidden |  |                                   | 2700                  |
| Oleaceae     | <i>Jasminum humile</i>                                          | radially symmetrical flower | hidden |  | floral guide mimics anther colour | 3200                  |
| Onagraceae   | <i>Epilobium royleanum</i>                                      | radially symmetrical flower | hidden |  | stigmata mimic stamens            | 4100                  |
| Primulaceae  | <i>Primula sikkimensis</i> cf                                   | radially symmetrical flower | hidden |  |                                   | 3200                  |
| Primulaceae  | <i>Androsace spinulifera</i>                                    | radially symmetrical flower | hidden |  | floral guide mimics anther colour | 3200                  |
| Primulaceae  | <i>Lysimachia christinae</i>                                    | radially symmetrical flower | hidden |  |                                   | 3200                  |
| Primulaceae  | <i>Lysimachia pumila</i>                                        | radially symmetrical flower | hidden |  |                                   | 3200                  |
| Primulaceae  | <i>Primula beesiana</i>                                         | radially symmetrical flower | hidden |  | floral guide mimics anther colour | 3400                  |
| Primulaceae  | <i>Primula bella</i>                                            | radially symmetrical flower | hidden |  |                                   | 4100                  |
| Primulaceae  | <i>Primula bulleyana</i>                                        | radially symmetrical flower | hidden |  | floral guide mimics anther colour | 3200                  |
| Primulaceae  | <i>Primula poissonii</i>                                        | radially symmetrical flower | hidden |  | floral guide mimics anther colour | 3200                  |
| Primulaceae  | <i>Primula poissonii</i>                                        | radially symmetrical flower | hidden |  | floral guide mimics anther colour | 2700                  |
| Primulaceae  | <i>Primula vialii</i>                                           | radially symmetrical flower | hidden |  |                                   | 3200                  |
| Primulaceae  | <i>Primula yunnanensis</i>                                      | radially symmetrical flower | hidden |  |                                   | 3200                  |
| Rosaceae     | <i>Neillia gracilis</i>                                         | radially symmetrical flower | hidden |  |                                   | 3400                  |

|                  |                                     |                             |                     |  |                                   |              |
|------------------|-------------------------------------|-----------------------------|---------------------|--|-----------------------------------|--------------|
| Rubiaceae        | Leptodermis potanini                | radially symmetrical flower | hidden              |  |                                   | 2700         |
| Scrophulariaceae | Buddleja fallowiana                 | radially symmetrical flower | hidden              |  |                                   | 2700         |
| Commelinaceae    | Cyanotis vaga                       | radially symmetrical flower | no nectar           |  | staminodes mimic stamens          | 2700         |
| Hypoxidaceae     | Hypoxis aurea                       | radially symmetrical flower | no nectar           |  |                                   | 2700         |
| Papaveraceae     | Meconopsis delavayi                 | radially symmetrical flower | no nectar           |  |                                   | 4100         |
| Papaveraceae     | Meconopsis rudis                    | radially symmetrical flower | no nectar           |  |                                   | 4100         |
| Plantaginaceae   | Plantago asiatica subsp.erosa       | radially symmetrical flower | no nectar           |  |                                   | 3400         |
| Ranunculaceae    | Anemone rivularis var. flore-minore | radially symmetrical flower | no nectar           |  | floral guide mimics anther colour | 3400         |
| Ranunculaceae    | Anemone trullifolia var.holophylla  | radially symmetrical flower | no nectar           |  |                                   | 3600         |
| Ranunculaceae    | Ranunculus yunnanensis              | radially symmetrical flower | no nectar           |  |                                   | 3600         |
| Ranunculaceae    | Thalictrum javanicum                | radially symmetrical flower | no nectar           |  |                                   | 3200         |
| Ranunculaceae    | Anemone hupehensis                  | radially symmetrical flower | no nectar           |  |                                   | 3200         |
| Ranunculaceae    | Anemone rupicola                    | radially symmetrical flower | no nectar           |  |                                   | 4100         |
| Ranunculaceae    | Caltha palustris                    | radially symmetrical flower | no nectar           |  | floral guide mimics anther colour | 3400         |
| Ranunculaceae    | Caltha scaposa                      | radially symmetrical flower | no nectar           |  |                                   | 4200 (Baima) |
| Ranunculaceae    | Clematis chrysocoma                 | radially symmetrical flower | no nectar           |  | stigmata mimic stamens            | 3200         |
| Ranunculaceae    | Clematis peterae                    | radially symmetrical flower | no nectar           |  |                                   | 2700         |
| Ranunculaceae    | Clematis ranunculoides              | radially symmetrical flower | no nectar           |  |                                   | 3200         |
| Ranunculaceae    | Ranunculus nephenogenes             | radially symmetrical flower | no nectar           |  | floral guide mimics anther colour | 3200         |
| Ranunculaceae    | Thalictrum delavayi                 | radially symmetrical flower | no nectar           |  |                                   | 2700         |
| Ranunculaceae    | Anemone rivularis                   | radially symmetrical flower | no nectar           |  |                                   | 3200         |
| Solanaceae       | Anisodus acutangulus                | radially symmetrical flower | no nectar           |  |                                   | 3200         |
| Crassulaceae     | Rhodiola chrysanthemifolia          | radially symmetrical flower | potentially visible |  |                                   | 4100         |
| Crassulaceae     | Sedum trullipetalum                 | radially symmetrical flower | potentially visible |  |                                   | 3200         |
| Dianthaceae      | Stellaria vestita                   | radially symmetrical flower | potentially visible |  |                                   | 3200         |
| Dianthaceae      | Stellaria yunnanensis               | radially symmetrical flower | potentially visible |  |                                   | 3400         |
| Hypericaceae     | Hypericum chosiyanum                | radially symmetrical flower | potentially visible |  |                                   | 2700         |
| Polygonaceae     | Fagopyrum dibotrys                  | radially symmetrical flower | potentially visible |  |                                   | 3200         |
| Polygonaceae     | Polygonum nepalense                 | radially symmetrical flower | potentially visible |  |                                   | 2700         |

|                 |                               |                                    |                     |  |                                   |      |
|-----------------|-------------------------------|------------------------------------|---------------------|--|-----------------------------------|------|
| Polygonaceae    | Polygonum paleaceum           | radially symmetrical flower        | potentially visible |  |                                   | 3400 |
| Polygonaceae    | Polygonum viviparum           | radially symmetrical flower        | potentially visible |  |                                   | 4100 |
| Polygonaceae    | Polygonum macrophyllum        | radially symmetrical flower        | potentially visible |  |                                   | 3600 |
| Saxifragaceae   | Saxifraga pallida             | radially symmetrical flower        | potentially visible |  | floral guide mimics anther colour | 3400 |
| Tofieldiaceae   | Tofieldia divergens           | radially symmetrical flower        | potentially visible |  |                                   | 2700 |
| Amaryllidaceae  | Allium beesianum              | radially symmetrical flower        | visible             |  |                                   | 4200 |
| Amaryllidaceae  | Allium mairei                 | radially symmetrical flower        | visible             |  |                                   | 3900 |
| Apiaceae        | Bupleurum rockii              | radially symmetrical flower        | visible             |  |                                   | 3200 |
| Apiaceae        | Heracleum yungningense        | radially symmetrical flower        | visible             |  |                                   | 3200 |
| Apiaceae        | Ligusticum pteridophyllum     | radially symmetrical flower        | visible             |  |                                   | 3200 |
| Apiaceae        | Ligusticum sinense Oliv       | radially symmetrical flower        | visible             |  |                                   | 3200 |
| Apiaceae        | Pleurospermum foetens         | radially symmetrical flower        | visible             |  |                                   | 4100 |
| Asparagaceae    | Ophiopogon bodinieri          | radially symmetrical flower        | visible             |  |                                   | 2700 |
| Balanophoraceae | Balanophora involucrata       | radially symmetrical flower        | visible             |  |                                   | 3200 |
| Berberidaceae   | Berberis pruinosa             | radially symmetrical flower        | visible             |  |                                   | 3200 |
| Brassicaceae    | Arabis paniculata             | radially symmetrical flower        | visible             |  |                                   | 3200 |
| Brassicaceae    | Cardamine gracilis            | radially symmetrical flower        | visible             |  |                                   | 3200 |
| Brassicaceae    | Cardamine granulifera         | radially symmetrical flower        | visible             |  |                                   | 3200 |
| Brassicaceae    | Dipoma iberideum              | radially symmetrical flower        | visible             |  |                                   | 4100 |
| Caprifoliaceae  | Dipsacus asper                | radially symmetrical flower        | visible             |  |                                   | 3200 |
| Caprifoliaceae  | Nardostachys jatamansi        | radially symmetrical flower        | visible             |  |                                   | 3200 |
| Caprifoliaceae  | Pterocephalus hookeri         | radially symmetrical flower        | visible             |  |                                   | 3200 |
| Caprifoliaceae  | Valeriana hardwickii          | radially symmetrical flower        | visible             |  |                                   | 3200 |
| Dianthaceae     | Arenaria barbata              | radially symmetrical flower        | visible             |  |                                   | 3400 |
| Dianthaceae     | Arenaria leptophylla          | radially symmetrical flower        | visible             |  |                                   | 4100 |
| Rutaceae        | Boenninghausenia sessilicarpa | radially symmetrical flower        | visible             |  | floral guide mimics anther colour | 2700 |
| Asteraceae      | Aster ageratoides cf          | radially symmetrical inflorescence | hidden              |  | inflorescence mimics androeceum   | 3400 |
| Asteraceae      | Aster brachytrichus           | radially symmetrical inflorescence | hidden              |  | inflorescence mimics androeceum   | 3900 |
| Asteraceae      | Aster jeffreyanus             | radially symmetrical inflorescence | hidden              |  |                                   | 3900 |

|            |                                          |                                    |        |  |                                   |      |
|------------|------------------------------------------|------------------------------------|--------|--|-----------------------------------|------|
| Asteraceae | <i>Aster oreophilus</i>                  | radially symmetrical inflorescence | hidden |  | inflorescence mimics androeceum   | 3200 |
| Asteraceae | <i>Bidens pilosa</i> var. <i>radiata</i> | radially symmetrical inflorescence | hidden |  |                                   | 2700 |
| Asteraceae | <i>Carpesium scapiforme</i>              | radially symmetrical inflorescence | hidden |  |                                   | 3200 |
| Asteraceae | <i>Cirsium lidiangense</i>               | radially symmetrical inflorescence | hidden |  |                                   | 2700 |
| Asteraceae | <i>Cremanthodium campanulatum</i>        | radially symmetrical inflorescence | hidden |  |                                   | 4100 |
| Asteraceae | <i>Cremanthodium nobile</i>              | radially symmetrical inflorescence | hidden |  |                                   | 3900 |
| Asteraceae | <i>Eupatorium heterophyllum</i>          | radially symmetrical inflorescence | hidden |  |                                   | 2700 |
| Asteraceae | <i>Galinsoga parviflora</i>              | radially symmetrical inflorescence | hidden |  | inflorescence mimics androeceum   | 3200 |
| Asteraceae | <i>Hippolytia delavayi</i>               | radially symmetrical inflorescence | hidden |  |                                   | 4200 |
| Asteraceae | <i>Inula helianthus-aquatilis</i>        | radially symmetrical inflorescence | hidden |  | inflorescence mimics androeceum   | 2700 |
| Asteraceae | <i>Leontopodium andersonii</i>           | radially symmetrical inflorescence | hidden |  |                                   | 3200 |
| Asteraceae | <i>Leontopodium calocephalum</i>         | radially symmetrical inflorescence | hidden |  |                                   | 4100 |
| Asteraceae | <i>Leontopodium sinense</i>              | radially symmetrical inflorescence | hidden |  |                                   | 2700 |
| Asteraceae | <i>Ligularia alatipes</i>                | radially symmetrical inflorescence | hidden |  | inflorescence mimics androeceum   | 2700 |
| Asteraceae | <i>Ligularia alatipes</i>                | radially symmetrical inflorescence | hidden |  |                                   | 3400 |
| Asteraceae | <i>Ligularia cymbulifera</i>             | radially symmetrical inflorescence | hidden |  |                                   | 3900 |
| Asteraceae | <i>Ligularia vellerea</i>                | radially symmetrical inflorescence | hidden |  | inflorescence mimics androeceum   | 3600 |
| Asteraceae | <i>Parasenecio lidjiangensis</i>         | radially symmetrical inflorescence | hidden |  | inflorescence mimics androeceum   | 3900 |
| Asteraceae | <i>Saussurea ciliaris</i>                | radially symmetrical inflorescence | hidden |  |                                   | 4100 |
| Asteraceae | <i>Saussurea leontodontoides</i>         | radially symmetrical inflorescence | hidden |  |                                   | 3900 |
| Asteraceae | <i>Senecio laetus</i>                    | radially symmetrical inflorescence | hidden |  |                                   | 2700 |
| Asteraceae | <i>Senecio spathiphyllus</i>             | radially symmetrical inflorescence | hidden |  | floral guide mimics anther colour | 2700 |
| Asteraceae | <i>Soroseris hookeriana</i>              | radially symmetrical inflorescence | hidden |  | floral guide mimics anther colour | 4100 |
| Asteraceae | <i>Synalathium souliei</i>               | radially symmetrical inflorescence | hidden |  |                                   | 4100 |

|                |                          |                                    |           |  |                                   |             |
|----------------|--------------------------|------------------------------------|-----------|--|-----------------------------------|-------------|
| Asteraceae     | Tagetes erecta           | radially symmetrical inflorescence | hidden    |  |                                   | 2700        |
| Asteraceae     | Tagetes patula           | radially symmetrical inflorescence | hidden    |  |                                   | 2700        |
| Asteraceae     | Taraxacum borealisinense | radially symmetrical inflorescence | hidden    |  | inflorescence mimics androeceum   | 3400        |
| Asteraceae     | Wedelia urticifolia      | radially symmetrical inflorescence | hidden    |  |                                   | 2200 (Yaxi) |
| Astraceae      | Cremanthodium smithianum | radially symmetrical inflorescence | hidden    |  |                                   | 4200        |
| Juncaceae      | Juncus gracilicaulis     | radially symmetrical inflorescence | no nectar |  |                                   | 3200        |
| Balsaminaceae  | Impatiens amplexicaulis  | zygomorphic flower                 | hidden    |  |                                   | 3200        |
| Balsaminaceae  | Impatiens delavayi       | zygomorphic flower                 | hidden    |  | floral guide mimics anther colour | 3200        |
| Balsaminaceae  | Impatiens desmantha      | zygomorphic flower                 | hidden    |  | floral guide mimics anther colour | 3200        |
| Balsaminaceae  | Impatiens margaritifera  | zygomorphic flower                 | hidden    |  | floral guide mimics anther colour | 4100        |
| Balsaminaceae  | Impatiens radiata        | zygomorphic flower                 | hidden    |  | floral guide mimics anther colour | 3200        |
| Balsaminaceae  | Impatiens uliginosa      | zygomorphic flower                 | hidden    |  | floral guide mimics anther colour | 2700        |
| Bignoniaceae   | Incarvillea lutea        | zygomorphic flower                 | hidden    |  | floral guide mimics anther colour | 3200        |
| Bignoniaceae   | Incarvillea mairei       | zygomorphic flower                 | hidden    |  | floral guide mimics anther colour | 3200        |
| Caprifoliaceae | Abelia dielsii           | zygomorphic flower                 | hidden    |  |                                   | 3200        |
| Caprifoliaceae | Dipelta yunnanensis      | zygomorphic flower                 | hidden    |  | floral guide mimics anther colour | 3200        |
| Fabaceae       | Astragalus camptodontus  | zygomorphic flower                 | hidden    |  | hidden pollen                     | 2700        |
| Fabaceae       | Astragalus pullus        | zygomorphic flower                 | hidden    |  | hidden pollen                     | 3400        |
| Fabaceae       | Cheseneya polystichoides | zygomorphic flower                 | hidden    |  | hidden pollen                     | 3400        |
| Fabaceae       | Crotalaria yunnanensis   | zygomorphic flower                 | hidden    |  | hidden pollen                     | 2700        |
| Fabaceae       | Glycyrrhiza yunnanensis  | zygomorphic flower                 | hidden    |  | hidden pollen                     | 2700        |
| Fabaceae       | Hylodesmum williamsii    | zygomorphic flower                 | hidden    |  | hidden pollen                     | 3200        |
| Fabaceae       | Indigofera cf            | zygomorphic flower                 | hidden    |  | hidden pollen                     | 4100        |
| Fabaceae       | Indigofera pendula       | zygomorphic flower                 | hidden    |  | hidden pollen                     | 3200        |
| Fabaceae       | Lespedeza formosa        | zygomorphic flower                 | hidden    |  | hidden pollen                     | 3200        |
| Fabaceae       | Lespedeza forrestii      | zygomorphic flower                 | hidden    |  | hidden pollen                     | 3200        |
| Fabaceae       | Lotus corniculatus       | zygomorphic flower                 | hidden    |  | hidden pollen                     | 2700        |
| Fabaceae       | Medicago lupulina        | zygomorphic flower                 | hidden    |  | hidden pollen                     | 3200        |
| Fabaceae       | Oxytropis yunnanensis    | zygomorphic flower                 | hidden    |  | hidden pollen                     | 4100        |
| Fabaceae       | Parochetus communis      | zygomorphic flower                 | hidden    |  | hidden pollen                     | 2700        |



|              |                          |                    |        |  |                                                     |      |
|--------------|--------------------------|--------------------|--------|--|-----------------------------------------------------|------|
| Fabaceae     | Tibetia yunnanensis      | zygomorphic flower | hidden |  | floral guide mimics anther colour and hidden pollen | 3200 |
| Fabaceae     | Trifolium repens cf      | zygomorphic flower | hidden |  | hidden pollen                                       | 2700 |
| Iridaceae    | Iris tectorum            | zygomorphic flower | hidden |  |                                                     | 3200 |
| Lamiaceae    | Ajuga forrestii          | zygomorphic flower | hidden |  | hidden pollen                                       | 3200 |
| Lamiaceae    | Ajuga lupulina           | zygomorphic flower | hidden |  | hidden pollen                                       | 3600 |
| Lamiaceae    | Clerodendrum yunnanense  | zygomorphic flower | hidden |  | hidden pollen                                       | 2700 |
| Lamiaceae    | Clinopodium megalanthum  | zygomorphic flower | hidden |  | hidden pollen                                       | 3200 |
| Lamiaceae    | Dracocephalum bullatum   | zygomorphic flower | hidden |  | hidden pollen                                       | 4100 |
| Lamiaceae    | Eriophyton wallichii     | zygomorphic flower | hidden |  | hidden pollen                                       | 4200 |
| Lamiaceae    | Galeopsis bifida         | zygomorphic flower | hidden |  | floral guide mimics anther colour and hidden pollen | 3200 |
| Lamiaceae    | Isodon irroratus         | zygomorphic flower | hidden |  | hidden pollen                                       | 3200 |
| Lamiaceae    | Isodon phyllopodus       | zygomorphic flower | hidden |  | hidden pollen                                       | 2700 |
| Lamiaceae    | Leonurus japonicus       | zygomorphic flower | hidden |  | hidden pollen                                       | 2700 |
| Lamiaceae    | Nepeta wilsonii          | zygomorphic flower | hidden |  | hidden pollen                                       | 3200 |
| Lamiaceae    | Phlomis atropurpurea     | zygomorphic flower | hidden |  | hidden pollen                                       | 3200 |
| Lamiaceae    | Phlomis likiangensis     | zygomorphic flower | hidden |  | hidden pollen                                       | 3400 |
| Lamiaceae    | Phlomis melanantha       | zygomorphic flower | hidden |  | hidden pollen                                       | 3400 |
| Lamiaceae    | Prunella hispida         | zygomorphic flower | hidden |  | hidden pollen                                       | 2700 |
| Lamiaceae    | Salvia aerea             | zygomorphic flower | hidden |  | hidden pollen                                       | 3200 |
| Lamiaceae    | Salvia digitaloides      | zygomorphic flower | hidden |  | hidden pollen                                       | 3400 |
| Lamiaceae    | Salvia flava             | zygomorphic flower | hidden |  | floral guide mimics anther colour and hidden pollen | 3600 |
| Lamiaceae    | Salvia trijuga           | zygomorphic flower | hidden |  | hidden pollen                                       | 3200 |
| Lamiaceae    | Scutellaria amoena       | zygomorphic flower | hidden |  | hidden pollen                                       | 3200 |
| Lamiaceae    | Scutellaria likiangensis | zygomorphic flower | hidden |  | hidden pollen                                       | 3200 |
| Lamiaceae    | Skapanthus oreophilus    | zygomorphic flower | hidden |  | hidden pollen                                       | 3200 |
| Lamiaceae    | Stachys japonica Miq.    | zygomorphic flower | hidden |  | hidden pollen                                       | 3200 |
| Loranthaceae | Taxillus colourea        | zygomorphic flower | hidden |  |                                                     | 3200 |
| Loranthaceae | Taxillus delavayi        | zygomorphic flower | hidden |  |                                                     | 3200 |
| Orchidaceae  | Gymnadenia conopsea      | zygomorphic flower | hidden |  | hidden pollen                                       | 3600 |
| Orchidaceae  | Habenaria delavayi       | zygomorphic flower | hidden |  | hidden pollen                                       | 2700 |

|                  |                                                        |                    |        |  |                                                     |                       |
|------------------|--------------------------------------------------------|--------------------|--------|--|-----------------------------------------------------|-----------------------|
| Orchidaceae      | <i>Neottia megalochila</i>                             | zygomorphic flower | hidden |  | hidden pollen                                       | 3200<br>(Yunshanping) |
| Orchidaceae      | <i>Neottianthe calcicola</i>                           | zygomorphic flower | hidden |  | hidden pollen                                       | 3600                  |
| Orchidaceae      | <i>Pecteilis susannae</i>                              | zygomorphic flower | hidden |  | hidden pollen                                       | 2200 (Yaxi)           |
| Orchidaceae      | <i>Satyrium ciliatum</i>                               | zygomorphic flower | hidden |  | hidden pollen                                       | 3200                  |
| Orchidaceae      | <i>Spiranthes sinensis</i>                             | zygomorphic flower | hidden |  | hidden pollen                                       | 3400                  |
| Orobanchaceae    | <i>Boschniakia himalaica</i>                           | zygomorphic flower | hidden |  | hidden pollen                                       | 3200                  |
| Orobanchaceae    | <i>Pedicularis comptoniaefolia</i>                     | zygomorphic flower | hidden |  | hidden pollen                                       | 3200                  |
| Orobanchaceae    | <i>Pedicularis crenata</i>                             | zygomorphic flower | hidden |  | hidden pollen                                       | 2700                  |
| Orobanchaceae    | <i>Pedicularis densispica</i>                          | zygomorphic flower | hidden |  | hidden pollen                                       | 3200                  |
| Orobanchaceae    | <i>Pedicularis likiangensis</i>                        | zygomorphic flower | hidden |  | hidden pollen                                       | 4100                  |
| Orobanchaceae    | <i>Pedicularis lutescens</i>                           | zygomorphic flower | hidden |  | hidden pollen                                       | 3200                  |
| Orobanchaceae    | <i>Pedicularis rex</i>                                 | zygomorphic flower | hidden |  | hidden pollen                                       | 2700                  |
| Orobanchaceae    | <i>Phtheirospermum tenuisectum</i>                     | zygomorphic flower | hidden |  | floral guide mimics anther colour and hidden pollen | 3200                  |
| Papaveraceae     | <i>Corydalis calcicola</i>                             | zygomorphic flower | hidden |  | hidden pollen                                       | 3600                  |
| Papaveraceae     | <i>Corydalis delavayi</i>                              | zygomorphic flower | hidden |  | floral guide mimics anther colour and hidden pollen | 3600                  |
| Papaveraceae     | <i>Corydalis gracillima</i> var. <i>microcalcarata</i> | zygomorphic flower | hidden |  | hidden pollen                                       | 3400                  |
| Papaveraceae     | <i>Corydalis pachycentra</i>                           | zygomorphic flower | hidden |  | hidden pollen                                       | 3600                  |
| Papaveraceae     | <i>Corydalis smithiana</i>                             | zygomorphic flower | hidden |  | hidden pollen                                       | 3200                  |
| Phrymaceae       | <i>Mimulus bodinieri</i>                               | zygomorphic flower | hidden |  | floral guide mimics anther colour and hidden pollen | 2700                  |
| Ranunculaceae    | <i>Aconitum stapfianum</i>                             | zygomorphic flower | hidden |  |                                                     | 3200                  |
| Ranunculaceae    | <i>Delphinium beesianum</i>                            | zygomorphic flower | hidden |  | hidden pollen                                       | 4100                  |
| Ranunculaceae    | <i>Delphinium grandiflorum</i>                         | zygomorphic flower | hidden |  | hidden pollen                                       | 2700                  |
| Scrophulariaceae | <i>Scrophularia spicata</i>                            | zygomorphic flower | hidden |  |                                                     | 3200                  |
| Violaceae        | <i>Viola biflora</i> var. <i>rockiana</i>              | zygomorphic flower | hidden |  | floral guide mimics anther colour and hidden pollen | 3900                  |
| Violaceae        | <i>Viola confertifolia</i>                             | zygomorphic flower | hidden |  | floral guide mimics anther colour and hidden pollen | 3600                  |
| Violaceae        | <i>Viola delavayi</i>                                  | zygomorphic flower | hidden |  | floral guide mimics anther colour and hidden pollen | 2700                  |
| Violaceae        | <i>Viola philippica</i>                                | zygomorphic flower | hidden |  | hidden pollen                                       | 2700                  |

|                  |                                   |                    |                     |  |                                                     |      |
|------------------|-----------------------------------|--------------------|---------------------|--|-----------------------------------------------------|------|
| Zingiberaceae    | <i>Roscoea cauleoides</i>         | zygomorphic flower | hidden              |  | floral guide mimics anther colour and hidden pollen | 3200 |
| Zingiberaceae    | <i>Roscoea schneideriana</i>      | zygomorphic flower | hidden              |  | floral guide mimics anther colour and hidden pollen | 2700 |
| Zingiberaceae    | <i>Roscoea tibetica</i>           | zygomorphic flower | hidden              |  | floral guide mimics anther colour and hidden pollen | 3400 |
| Araceae          | <i>Arisaema franchetianum</i>     | zygomorphic flower | hidden or no nectar |  |                                                     | 2700 |
| Araceae          | <i>Arisaema erubescens</i>        | zygomorphic flower | hidden or no nectar |  |                                                     | 3200 |
| Aristolochiaceae | <i>Aristolochia faucimaculata</i> | zygomorphic flower | hidden or no nectar |  |                                                     | 3200 |
| Campanulaceae    | <i>Lobelia sessilifolia</i>       | zygomorphic flower | hidden or no nectar |  |                                                     | 2700 |
| Orchidaceae      | <i>Galearis spathulata</i>        | zygomorphic flower | hidden or no nectar |  | hidden pollen                                       | 4100 |
| Orobanchaceae    | <i>Pedicularis dunniana</i>       | zygomorphic flower | hidden or no nectar |  | hidden pollen                                       | 4100 |
| Commelinaceae    | <i>Commelina maculata</i>         | zygomorphic flower | no nectar           |  | staminodes mimic stamens                            | 2700 |
| Commelinaceae    | <i>Murdannia divergens</i>        | zygomorphic flower | no nectar           |  | staminodes mimic stamens                            | 2700 |
| Commelinaceae    | <i>Streptolirion volubile</i>     | zygomorphic flower | no nectar           |  | filmental hairs mimic pollen colour                 | 3200 |
| Orchidaceae      | <i>Amitostigma basifoliatum</i>   | zygomorphic flower | no nectar           |  | hidden pollen                                       | 3200 |
| Orchidaceae      | <i>Cypripedium flavum</i>         | zygomorphic flower | no nectar           |  | hidden pollen                                       | 3200 |
| Orchidaceae      | <i>Cypripedium plectrochilum</i>  | zygomorphic flower | no nectar           |  | hidden pollen                                       | 3200 |
| Orchidaceae      | <i>Cypripedium tibeticum</i>      | zygomorphic flower | no nectar           |  | hidden pollen                                       | 3200 |
| Orchidaceae      | <i>Orchis chusua</i>              | zygomorphic flower | no nectar           |  | hidden pollen                                       | 3600 |
| Orchidaceae      | <i>Pleione scopulorum</i>         | zygomorphic flower | no nectar           |  | floral guide mimics anther colour and hidden pollen | 3200 |
| Orobanchaceae    | <i>Pedicularis alopecuros</i>     | zygomorphic flower | no nectar           |  | hidden pollen                                       | 3200 |
| Orobanchaceae    | <i>Pedicularis cephalantha</i>    | zygomorphic flower | no nectar           |  | hidden pollen                                       | 3200 |
| Orobanchaceae    | <i>Pedicularis elwesii</i>        | zygomorphic flower | no nectar           |  | hidden pollen                                       | 3900 |
| Orobanchaceae    | <i>Pedicularis gracilis</i>       | zygomorphic flower | no nectar           |  | hidden pollen                                       | 3200 |
| Orobanchaceae    | <i>Pedicularis gruina</i>         | zygomorphic flower | no nectar           |  | hidden pollen                                       | 3200 |
| Orobanchaceae    | <i>Pedicularis integrifolia</i>   | zygomorphic flower | no nectar           |  | hidden pollen                                       | 3900 |
| Orobanchaceae    | <i>Pedicularis lachnoglossa</i>   | zygomorphic flower | no nectar           |  | hidden pollen                                       | 3900 |
| Orobanchaceae    | <i>Pedicularis rhodotricha</i>    | zygomorphic flower | no nectar           |  | hidden pollen                                       | 3900 |

|                  |                                  |                    |                     |  |                                     |            |
|------------------|----------------------------------|--------------------|---------------------|--|-------------------------------------|------------|
| Orobanchaceae    | Pedicularis siphonantha          | zygomorphic flower | no nectar           |  | hidden pollen                       | 4100       |
| orobanchaceae    | Pedicularis superba              | zygomorphic flower | no nectar           |  | hidden pollen                       | 4100       |
| Orobanchaceae    | Pedicularis confertiflora        | zygomorphic flower | no nectar           |  | hidden pollen                       | 4200       |
| Ericaceae        | Rhododendron fastigiatum         | zygomorphic flower | potentially visible |  |                                     | 3900       |
| Scrophulariaceae | Verbascum thapsus                | zygomorphic flower | potentially visible |  | filmental hairs mimic pollen colour | 2700       |
| Ericaceae        | Rhododendron decorum             | zygomorphic flower | visible             |  | floral guide mimics anther colour   | 3200       |
| Ericaceae        | Rhododendron hippophaeoides cf   | zygomorphic flower | visible             |  |                                     | 3200       |
| Ericaceae        | Rhododendron lepidotum           | zygomorphic flower | visible             |  |                                     | 3200       |
| Ericaceae        | Rhododendron yunnanense          | zygomorphic flower | visible             |  | floral guide mimics anther colour   | 3200       |
| Hydrangaceae     | Philadelphus calvescens          | zygomorphic flower | visible             |  |                                     | 3200       |
| Liliaceae        | Lilium taliense                  | zygomorphic flower | visible             |  |                                     | 3200       |
| Liliaceae        | Lloydia tibetica                 | zygomorphic flower | visible             |  | floral guide mimics anther colour   | 3400       |
| Liliaceae        | Lloydia yunnanensis              | zygomorphic flower | visible             |  |                                     | 3200       |
| Liliaceae        | Notholirion bulbuliferum         | zygomorphic flower | visible             |  |                                     | 3600       |
| Nartheciaceae    | Aletris pauciflora var. khasiana | zygomorphic flower | visible             |  |                                     | 3200       |
| Orchidaceae      | Peristylus coeloceras            | zygomorphic flower | visible             |  | hidden pollen                       | 3400       |
| Orchidaceae      | Peristylus forceps               | zygomorphic flower | visible             |  | hidden pollen                       | 3200       |
| Plantaginaceae   | Veronica piroliformis            | zygomorphic flower | visible             |  |                                     | 3200       |
| Rosaceae         | Agrimonia pilosa var. nepalensis | zygomorphic flower | visible             |  |                                     | 2700       |
| Rosaceae         | Fragaria vesca                   | zygomorphic flower | visible             |  |                                     | 2700       |
| Rosaceae         | Geum aleppicum                   | zygomorphic flower | visible             |  | stigma mimics stamen                | 2700       |
| Rosaceae         | Rosa sericea                     | zygomorphic flower | visible             |  | stigma mimics stamen                | 2700       |
| Rosaceae         | Rubus biflorus cf                | zygomorphic flower | visible             |  |                                     | 2700       |
| Rosaceae         | Rubus fockeanus                  | zygomorphic flower | visible             |  |                                     | 3600       |
| Rosaceae         | Sanguisorba filiformis           | zygomorphic flower | visible             |  |                                     | 2700       |
| Rosaceae         | Sanguisorba officinalis          | zygomorphic flower | visible             |  |                                     | 2700       |
| Rosaceae         | Spiraea lichiangensis            | zygomorphic flower | visible             |  |                                     | greenhouse |

**Table S2.** Summary of the results shown in Table S1 indication the number and percentage of species with features relevant in the context of nectar mimicry

| <b>Category</b>                                         | <b>No. of species</b> | <b>Percentage (%)</b> |
|---------------------------------------------------------|-----------------------|-----------------------|
| species with radially symmetrical flowers               | 174                   | 56.3                  |
| with glossy area                                        | 38                    | 12.3                  |
| without glossy area                                     | 136                   | 44.0                  |
| species with nectar visible/potentially visible         | 88                    | 28.5                  |
| with glossy area                                        | 31                    | 10.0                  |
| without glossy area                                     | 57                    | 18.4                  |
| species with pollen-mimicking structure                 | 75                    | 24.3                  |
| species with glossy and with pollen-mimicking structure | 17                    | 5.5                   |
| species with hidden or no nectar                        | 221                   | 71.5                  |
| species with zygomorphic flowers                        | 135                   | 43.7                  |
| with glossy area                                        | 1                     | 0.3                   |
| all species                                             | 309                   | 100.0                 |

**Table S3.** RGB-values of flowers in China from false colour photos as calculated in Irvan View (in bracts bee-visible range of wavelength)

\* indicates glossy area, adjacent area was used for calculations; Colour refers to the human-visible colour; (UV) refers to the ultraviolet reflecting (+) or UV-absorbing (-) properties

| <b>Species</b>                   | <b>Family</b> | <b>Structure</b>              | <b>Colour (UV)</b> | <b>red (green)</b> | <b>green (blue)</b> | <b>blue (UV)</b> |
|----------------------------------|---------------|-------------------------------|--------------------|--------------------|---------------------|------------------|
| <i>Parnassia wightiana</i>       | Celastraceae  | staminode *                   | green (-)          | 66.82              | 10.38               | 168.07           |
|                                  |               | staminode, adjacent area      | green (-)          | 63.89              | 0.32                | 31.83            |
|                                  |               | petal, middle                 | white (-)          | 117.89             | 89.93               | 24.47            |
| <i>Saxifraga unguiculata</i>     | Saxifragaceae | protuberance, petal *         | yellow (-)         | 113.15             | 0.86                | 208.64           |
|                                  |               | petal, adjacent area          | yellow (-)         | 115.25             | 0.16                | 69.21            |
|                                  |               | petal, middle                 | yellow (-)         | 127.71             | 0.26                | 70.65            |
| <i>Saxifraga nigrograndulosa</i> | Saxifragaceae | protuberance, petal *         | yellow (-)         | 243.3              | 11.27               | 240.73           |
|                                  |               | protuberance, adjacent area   | yellow (-)         | 129.71             | 0.21                | 86.37            |
|                                  |               | petal, middle                 | yellow (-)         | 151.33             | 0.23                | 92.3             |
| <i>Saxifraga diversifolia</i>    | Saxifragaceae | protuberance on petal *       | yellow (-)         | 108.55             | 0.52                | 200.59           |
|                                  |               | protuberance, adjacent area   | yellow (-)         | 104.57             | 0.29                | 73.39            |
|                                  |               | petal, middle                 | yellow (-)         | 123.66             | 0.31                | 69.98            |
|                                  |               | nectary                       | yellow (-)         | 103.7              | 40.04               | 203.43           |
| <i>Saxifraga melanocentra</i>    | Saxifragaceae | disc *                        | black (-)          | 98.02              | 130.95              | 211.37           |
|                                  |               | margin of disc                | black (-)          | 34.63              | 39.4                | 48.94            |
|                                  |               | petal, middle                 | white (-)          | 247.96             | 252.33              | 30.53            |
| <i>Codonopsis graminifolia</i>   | Campanulaceae | basis of petal *              | black (-)          | 93.57              | 110.16              | 212.5            |
|                                  |               | basis of petal, adjacent area | black (-)          | 6.96               | 13.63               | 40.56            |
|                                  |               | petal, middle                 | blue (+)           | 87.41              | 173.05              | 234.38           |
| <i>Saxifraga signata</i>         |               | protuberance on petal *       | yellow (-)         | 231.82             | 140.64              | 230.61           |
|                                  |               | petal, middle                 | yellow (-)         | 180.8              | 54.13               | 82.46            |
| <i>Anaphalis nepalensis</i>      | Asteraceae    | petal, base *                 | white (-)          | 159.48             | 160.61              | 254.41           |
|                                  |               | petal, tip                    | white (-)          | 96.17              | 77.72               | 82.48            |

|                                |               |                             |            |        |        |        |
|--------------------------------|---------------|-----------------------------|------------|--------|--------|--------|
| <i>Trollius yunnanensis</i>    | Ranunculaceae | staminode *                 |            | 137.84 | 18.08  | 228.76 |
|                                |               | staminode, adjacent area    |            | 107.53 | 0      | 109.38 |
| <i>Parnassia delavayi</i>      | Celeastraceae | staminode *                 | green (-)  | 18.54  | 0.96   | 242.94 |
|                                |               | staminode, adjacent area    | green (-)  | 14.84  | 0.22   | 72.98  |
|                                |               | petal middle                | white (-)  | 127.07 | 137.06 | 178.17 |
| <i>Parnassia yunnanensis</i>   | Celeastraceae | staminode *                 | green (-)  | 53.06  | 30.06  | 198.79 |
|                                |               | staminode, adjacent area    | green (-)  | 23.83  | 0.01   | 26.66  |
|                                |               | petal middle                | green (-)  | 141.58 | 70.26  | 173.4  |
| <i>Potentilla lancinata</i> cf | Rosaceae      | protuberance *              | yellow (-) | 52.05  | 2.21   | 228.28 |
|                                |               | protuberance, adjacent area | yellow (-) | 51.02  | 0.68   | 35.42  |
|                                |               | petal, base                 | yellow (-) | 78.97  | 0.29   | 29.49  |

---

**Table S4.** RGB-values of flowers in Germany, Switzerland and Australia from false colour photos in Irvan View (in bracts bee-visible range of wavelength)

\* indicates glossy area, adjacent area was used for calculations; Colour refers to the human-visible colour; (UV) refers to the ultraviolet reflecting (+) or UV-absorbing (-) properties

| <b>Species</b>               | <b>Family</b> | <b>Structure</b>            | <b>Colour (UV)</b> | <b>red (green)</b> | <b>green (blue)</b> | <b>blue (UV)</b> |
|------------------------------|---------------|-----------------------------|--------------------|--------------------|---------------------|------------------|
| <i>Saxifraga stolonifera</i> | Saxifragaceae | disc *                      | yellow (-)         | 111.45             | 0.65                | 247.99           |
|                              |               | disc, adjacent area         | yellow(-)          | 101.4              | 0.55                | 69.23            |
|                              |               | petal, downward             | white (-)          | 170.36             | 174.96              | 239.7            |
| <i>Rudbeckia fuliginosa</i>  | Asteraceae    | anthers *                   | black (-)          | 85.98              | 93.63               | 238.26           |
|                              |               | anthers, adjacent area      | black (-)          | 16.89              | 7.88                | 58.79            |
|                              |               | petal, base                 | yellow (-)         | 243.69             | 5.13                | 107.07           |
| <i>Tulipa gesneriana</i>     | Liliaceae     | petal, base *               | black (-)          | 119.02             | 126.78              | 176.57           |
|                              |               | petal, base adjacent        | black (-)          | 30.11              | 35.24               | 54.42            |
|                              |               | petal middle                | red (-)            | 27.85              | 30.28               | 45.2             |
| <i>Massonia pustulata</i>    | Asparagaceae  | nectar *                    | black (-)          | 38.52              | 28.96               | 139.54           |
|                              |               | nectar, adjacent            | black (-)          | 41.34              | 32.01               | 19.29            |
|                              |               | filament                    | white +            | 181.17             | 177.33              | 10.27            |
| <i>Parnassia palustris</i>   | Celastraceae  | staminode, head *           | yellow (-)         | 92.93              | 30.4                | 142.8            |
|                              |               | staminode, adjacent area    | yellow (-)         | 57.5               | 11.58               | 14               |
|                              |               | petal                       |                    | 134.05             | 119.79              | 21.48            |
| <i>Solanum dulcamara</i>     | Solanaceae    | floral guide *              | green (-)          | 163.88             | 152.16              | 133.02           |
|                              |               | floral guide, adjacent area | green (-)          | 142.2              | 89.99               | 36.35            |
|                              |               | petal                       | pink +             | 112.43             | 143.69              | 66.83            |
| <i>Anemone coronaria</i>     | Ranunculaceae | petal, base *               | white (-)          | 216.83             | 225.38              | 104.44           |
|                              |               | petal, base, adjacent       | white (-)          | 182.17             | 191.58              | 18.22            |
|                              |               | petal, middle               | red (-)            | 41.73              | 0.38                | 14.23            |
| <i>Swainsonia formosa</i>    | Fabaceae      | bulb *                      | black (-)          | 230.75             | 241.51              | 218.32           |
|                              |               | bulb, adjacent              | black (-)          | 12.72              | 24.61               | 24.83            |
|                              |               | corolla                     | red (-)            | 17.55              | 20.37               | 8.3              |



**Table S5.** Species with glossy structures in the Hengduan mountains. Species, from which quantitative measurements were taken are highlighted in yellow. Remarks explain the reasons why from some species were excluded.

| SPECIES<br>(FAMILY)                            | VISIBLE NECTAR &<br>GLOSSY STRUCTURE                                              | REMARKS                                                                                                                                           | COLOUR PHOTO / UV-PHOTO / FALSE COLOUR PHOTO                                          |
|------------------------------------------------|-----------------------------------------------------------------------------------|---------------------------------------------------------------------------------------------------------------------------------------------------|---------------------------------------------------------------------------------------|
| Anaphalis<br>chlamydophylla<br>(Asteraceae)    | glossy floral guide with<br>hidden nectar                                         | photos taken without sunshine,<br>inflorescences only open in full<br>sunshine, evidence for glossy<br>structures from personal<br>observation    |    |
| Anaphalis<br>nepalensis<br>(Asteraceae)        | glossy floral guide with<br>hidden nectar                                         | quantitative data collected                                                                                                                       | Photos see Fig. 1g-i                                                                  |
| Anaphalis<br>yunnanensis cf<br>(Asteraceae)    | glossy floral guide with<br>hidden nectar                                         | photos taken with a different<br>camera system, photos of<br>insufficient quality, evidence<br>for glossy structures from<br>personal observation |    |
| Codonopsis<br>bulleyana<br>(Campanulaceae)     | radially symmetrical flower<br>with visible nectar,<br>glossy basal part of petal | photos taken without sunshine,<br>evidence for glossy structures<br>from personal observation                                                     |    |
| Codonopsis<br>convolvulacea<br>(Campanulaceae) | radially symmetrical flower<br>with visible nectar,<br>glossy basal part of petal | photos taken without sunshine<br>and different camera system                                                                                      |  |
| Codonopsis<br>graminifolia<br>(Campanulaceae)  | radially symmetrical flower<br>with visible nectar,<br>glossy basal part of petal | quantitative data collected                                                                                                                       | Photos see Fig. 1m-o                                                                  |
| Cyananthus<br>formosus<br>(Campanulaceae)      | glossy part of petal with<br>hidden nectar                                        | photos taken without sunshine<br>and different camera system,<br>evidence for glossy structures<br>from personal observation                      |  |

|                                        |                                         |                                                                                                                     |                                                                                       |                                                                                       |                                                                                       |  |
|----------------------------------------|-----------------------------------------|---------------------------------------------------------------------------------------------------------------------|---------------------------------------------------------------------------------------|---------------------------------------------------------------------------------------|---------------------------------------------------------------------------------------|--|
| Cyananthus longiflorus (Campanulaceae) | glossy part of petal with hidden nectar | photos taken without sunshine and different camera system, evidence for glossy structures from personal observation |    |    |                                                                                       |  |
| Cyananthus hookeri (Campanulaceae)     | glossy part of petal with hidden nectar | photos taken without sunshine and different camera system, evidence for glossy structures from personal observation |    |    |                                                                                       |  |
| Parnassia delavayi (Celastraceae)      | glossy staminodes, nectar visible       | quantitative data collected                                                                                         |    |    |    |  |
| Parnassia mysorensis (Celastraceae)    | glossy staminodes, visible              | photos taken without sunshine and different camera system, evidence for glossy structures from personal observation |    |    |                                                                                       |  |
| Parnassia tenella (Celastraceae)       | glossy staminodes, nectar visible       | photos taken without sunshine and different camera system, evidence for glossy structures from personal observation |   |   |   |  |
| Parnassia wightiana (Celastraceae)     | glossy staminodes, nectar visible       | quantitative data collected                                                                                         | Photos see Fig. 1j-l                                                                  |                                                                                       |                                                                                       |  |
| Parnassia yunnanensis (Celastraceae)   | glossy staminodes, nectar visible       | quantitative data collected                                                                                         |  |  |  |  |

|                                      |                                                                                              |                                                                                                                      |                                                                                       |                                                                                       |  |
|--------------------------------------|----------------------------------------------------------------------------------------------|----------------------------------------------------------------------------------------------------------------------|---------------------------------------------------------------------------------------|---------------------------------------------------------------------------------------|--|
| Geranium delavayi (Erodaceae)        | radially symmetrical flower with visible nectar, glossy basal part of petals and sepals      | photos taken without sunshine, evidence for glossy structures on petal and sepals from personal observation          |     |     |  |
| Geranium strictipes (Erodaceae)      | radially symmetrical flower with visible nectar, glossy basal part of petals and sepals      | photos taken without sunshine, evidence for glossy structures on petals and sepals from personal observation         |    |    |  |
| Swertia cincta (Gentianaceae)        | radially symmetrical flower with visible nectar, glossy basal part of petal                  | photos taken without sunshine and different camera system, evidence for glossy structures from personal observation  |    |    |  |
| Swertia macrosperma (Gentianaceae)   | radially symmetrical flower with visible nectar, glossy basal part of petal                  | photos taken without sunshine and different camera system, evidence for glossy structures from personal observation, |    |    |  |
| Swertia punicea (Gentianaceae)       | radially symmetrical flower with visible nectar, glossy basal part of petal                  | photos taken without sunshine and different camera system, evidence for glossy structures from personal observation  |   |   |  |
| Trollius yunnanensis (Ranunculaceae) | glossy staminodes, no nectar                                                                 | quantitative data collected                                                                                          | Photos see Fig. 1p-r                                                                  |                                                                                       |  |
| Potentilla anserina (Rosaceae)       | radially symmetrical flower with visible nectar, glossy central structures and glossy sepals | photos taken without sunshine, evidence for glossy structures in center and on sepals from personal observation      |  |  |  |

|                                               |                                                                                              |                                                                                                                                                                     |                                                                                       |                                                                                       |                                                                                       |
|-----------------------------------------------|----------------------------------------------------------------------------------------------|---------------------------------------------------------------------------------------------------------------------------------------------------------------------|---------------------------------------------------------------------------------------|---------------------------------------------------------------------------------------|---------------------------------------------------------------------------------------|
| Potentilla articulata (Rosaceae)              | radially symmetrical flower with visible nectar, glossy central structures and glossy sepals | photos taken with different camera system, evidence for glossy structures in center and on sepals from personal observation                                         |     |     |                                                                                       |
| Potentilla coriandrifolia (Rosaceae)          | radially symmetrical flower with visible nectar, glossy central structures and glossy sepals | photos taken without sunshine and different camera system, evidence for glossy structures in center and on sepals in center and on sepals from personal observation |    |    |                                                                                       |
| Potentilla eriocarpa (Rosaceae)               | radially symmetrical flower with visible nectar, glossy central structures and glossy sepals | photos of insufficient quality, evidence for glossy structures in center and on sepals from personal observation                                                    |    |    |    |
| Potentilla fruticosa (Rosaceae)               | radially symmetrical flower with visible nectar, glossy central structures and glossy sepals | photos taken with different camera system, evidence for glossy structures in center and on sepals from personal observation                                         |    |    |    |
| Potentilla glabra (Rosaceae)                  | radially symmetrical flower with visible nectar, glossy central structures and glossy sepals | photos taken with different camera system, evidence for glossy structures in center and on sepals from personal observation                                         |   |   |                                                                                       |
| Potentilla lancinata cf (Rosaceae)            | radially symmetrical flower with visible nectar, glossy central structures and glossy sepals | quantitative data collected                                                                                                                                         |  |  |  |
| Potentilla peduncularis var. curta (Rosaceae) | radially symmetrical flower with visible nectar, glossy central structures and glossy sepals | photos taken without sunshine and different camera system, evidence for glossy structures from personal observation                                                 |  |  |                                                                                       |

|                                           |                                                              |                                                                                                                     |                                                                                       |                                                                                       |  |
|-------------------------------------------|--------------------------------------------------------------|---------------------------------------------------------------------------------------------------------------------|---------------------------------------------------------------------------------------|---------------------------------------------------------------------------------------|--|
| Saxifraga melanocentra (Saxifragaceae)    | radially symmetrical flower with visible nectar, glossy disc | quantitative data collected                                                                                         | Photos see Fig. 1a-c                                                                  |                                                                                       |  |
| Saxifraga rufescens (Saxifragaceae)       | zygomorphic flower with visible nectar, glossy disc          | photos taken without sunshine, evidence for glossy structures from personal observation                             |    |    |  |
| Saxifraga aristulata (Saxifragaceae)      | glossy protuberances, nectar visible                         | photos taken without sunshine and different camera system, evidence for glossy structures from personal observation |    |    |  |
| Saxifraga diversifolia, (Saxifragaceae)   | glossy protuberances, nectar visible                         | quantitative data collected                                                                                         | Photos see Fig. 2d-f                                                                  |                                                                                       |  |
| Saxifraga filicaulis (Saxifragaceae)      | glossy protuberances, nectar visible                         | photos taken without sunshine and different camera system, evidence for glossy structures from personal observation |    |    |  |
| Saxifraga gemmipara (Saxifragaceae)       | glossy protuberances, nectar visible                         | photos taken without sunshine and different camera system, evidence for glossy structures from personal observation |   |   |  |
| Saxifraga hispidula (Saxifragaceae)       | glossy protuberances, nectar visible                         | photos taken without sunshine and different camera system, evidence for glossy structures from personal observation |  |  |  |
| Saxifraga nigroglandulosa (Saxifragaceae) | glossy protuberances, nectar visible                         | quantitative data collected                                                                                         | Photos see Fig. 2g-i                                                                  |                                                                                       |  |

|                                       |                                            |                                                                                                                     |                                                                                     |                                                                                     |                                                                                     |
|---------------------------------------|--------------------------------------------|---------------------------------------------------------------------------------------------------------------------|-------------------------------------------------------------------------------------|-------------------------------------------------------------------------------------|-------------------------------------------------------------------------------------|
| Saxifraga strigosa (Saxifragaceae)    | glossy protuberances, nectar visible       | photos taken without sunshine and different camera system, evidence for glossy structures from personal observation |   |   |                                                                                     |
| Saxifraga wallichiana (Saxifragaceae) | glossy protuberances, nectar visible       | photos taken without sunshine and different camera system, evidence for glossy structures from personal observation |  |  |                                                                                     |
| Saxifraga signata (Saxifragaceae)     | glossy protuberances, nectar visible       | quantitative data collected                                                                                         | Photos see Fig. 1d-f                                                                |                                                                                     |                                                                                     |
| Saxifraga unguiculata (Saxifragaceae) | glossy protuberances, nectar visible       | quantitative data collected                                                                                         | Photos see Fig. 2a-c                                                                |                                                                                     |                                                                                     |
| Nicandra physalodes (Solanaceae)      | radially symmetrical flower with no nectar | photos taken without sunshine and different camera system, evidence for glossy structures from personal observation |  |  |  |

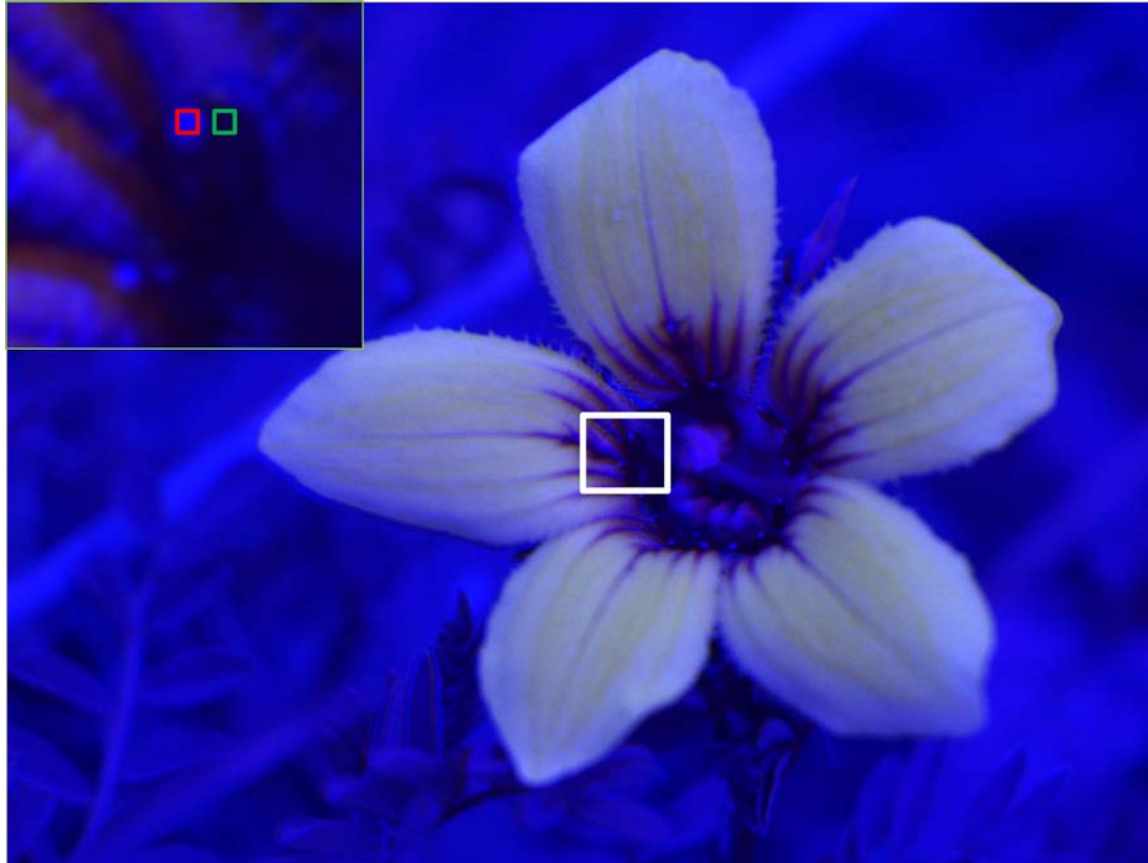

**Fig. S1.** Example of *Parnassia delavayi* for quantification of the difference in the reflection in the ultraviolet, blue, and green ranges of wavelengths was quantified using IrfanView image's histogram (free from [www.irfanview.com](http://www.irfanview.com)). Enlarged area of the false color picture used for the measurements (white). Inset: Uniformly coloured, glossy area (red) and adjacent, non-glossy area of the same structure (green) were measured in the same way.

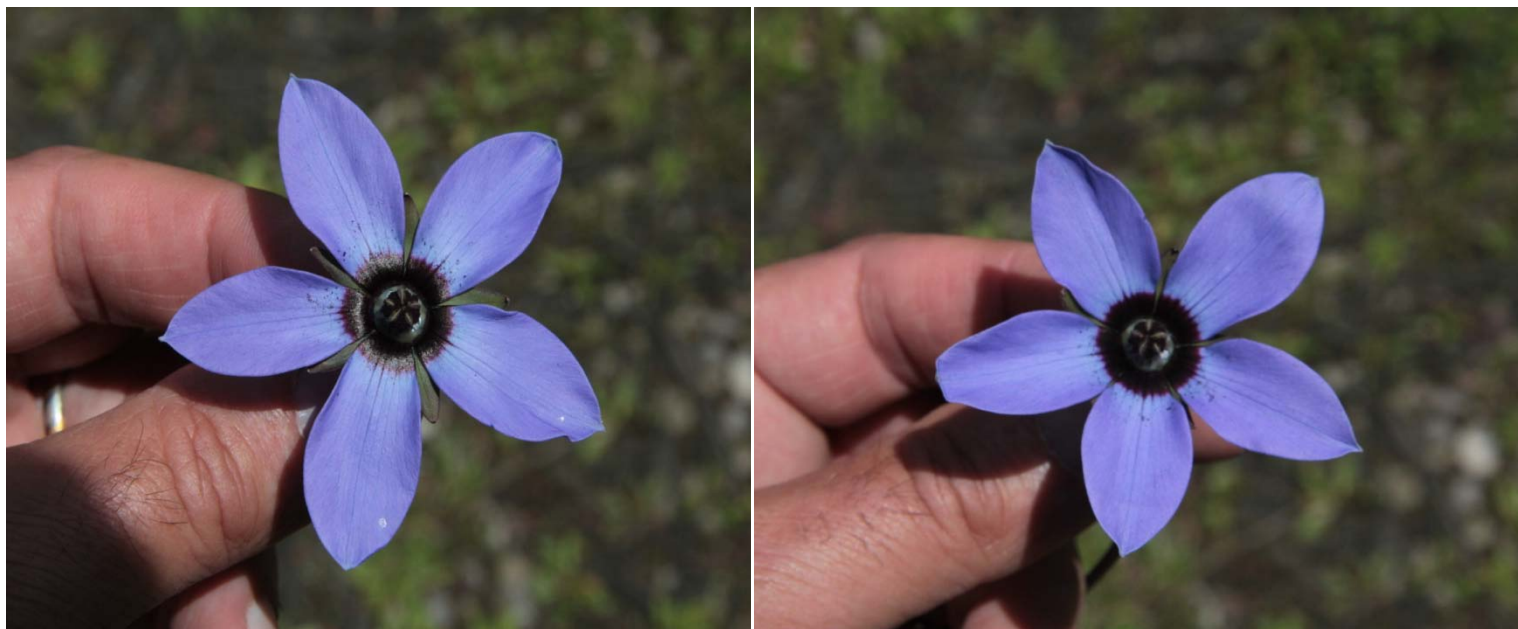

**Fig. S2.** Example of *Codonopsis graminifolia* showing that the gloss of the concave structures in the dark basal part of the petals is strictly dependent of the angle of the flower and the sun. Note the shadow on the fingers in order to estimate the position in relation to the sun.
